# Supplementary material for: Developing Consensus Standard Operating Procedures (SOPs) to Evaluate New Types of Insecticide-Treated Nets
Source: MDPI journal article supplement (doi:10.3390/insects13010007), 2021-12-21
Supplement: s1 [file s1]

**Additional File S1: Developing consensus SOPs for evaluating new types of insecticide treated nets - supplementary tables and figures**

Table S1. List of WHO prequalified pyrethroid + PBO nets and their product specifications [3].

| Net name     | Als                       | PBO location | Insecticide content                                                                                                                                                                                                               |
|--------------|---------------------------|--------------|-----------------------------------------------------------------------------------------------------------------------------------------------------------------------------------------------------------------------------------|
| DuraNet Plus | Alpha-cypermethrin<br>PBO | Sides & roof | 6.0 g/kg (270 mg/m <sup>2</sup> ) alpha-cypermethrin<br>2.2 g/kg (99 mg/m <sup>2</sup> ) PBO                                                                                                                                      |
| VEERALIN     | Alpha-cypermethrin<br>PBO | Sides & roof | 6.0 g/kg (216 mg/m <sup>2</sup> ) alpha-cypermethrin<br>2.2 g/kg (79 mg/m <sup>2</sup> ) PBO                                                                                                                                      |
| PermaNet 3.0 | Deltamethrin<br>PBO       | Roof         | Roof:<br>4 g/kg deltamethrin<br>25 g/kg PBO<br>Sides (deltamethrin only):<br>2.8 g/kg for 75 denier (115 mg/m <sup>2</sup> for strengthened border, and 85 mg/m <sup>2</sup> for remaining side panel)<br>2.1 g/kg for 100 denier |
| Tsara Boost  | Deltamethrin<br>PBO       | Sides & roof | 12% (120 mg/m <sup>2</sup> ) deltamethrin<br>44% (440 mg/m <sup>2</sup> ) PBO                                                                                                                                                     |
| Tsara Plus   | Deltamethrin<br>PBO       | Roof         | Roof:<br>3g/kg (120mg/m <sup>2</sup> ) deltamethrin<br>11g/kg (440 mg/m <sup>2</sup> ) PBO<br>Sides:<br>2.5g/kg (100mg/m <sup>2</sup> ) deltamethrin                                                                              |
| Olyset Plus  | Permethrin<br>PBO         | Sides & roof | 2% w/w permethrin (20g/kg, 800 mg/m <sup>2</sup> )<br>1% w/w PBO (10 g/kg, 400 mg/m <sup>2</sup> )                                                                                                                                |

Table S2. List of WHO prequalified pyrethroid + PPF nets and its product specifications [3].

| Net name    | Insecticides                       | Insecticide content                                                                                                                                                                            |
|-------------|------------------------------------|------------------------------------------------------------------------------------------------------------------------------------------------------------------------------------------------|
| Royal Guard | Alpha-cypermethrin<br>Pyriproxyfen | <ul style="list-style-type: none"> <li>120 denier: 5.5 g/kg alpha-cypermethrin and 5.5 g/kg pyriproxyfen</li> <li>150 denier: 5.0 g/kg alpha-cypermethrin and 5.0 g/kg pyriproxyfen</li> </ul> |

Table S3. List of WHO prequalified pyrethroid + CFP net and its product specifications [3].

| Net name             | Insecticides                       | Insecticide content                                                                                                                  |
|----------------------|------------------------------------|--------------------------------------------------------------------------------------------------------------------------------------|
| Interceptor G2 (IG2) | Chlorfenapyr<br>Alpha-cypermethrin | <ul style="list-style-type: none"> <li>200 mg/m<sup>2</sup> chlorfenapyr</li> <li>100 mg/m<sup>2</sup> alpha-cypermethrin</li> </ul> |

## References

- [3] WHO, "Prequalified Vector Control Products | WHO - Prequalification of Medical Products (IVDs, Medicines, Vaccines and Immunization Devices, Vector Control)," 2020.

<https://extranet.who.int/pqweb/vector-control-products/prequalified-product-list> (accessed Aug. 02, 2021).
