# Supplementary material for: Developing Consensus Standard Operating Procedures (SOPs) to Evaluate New Types of Insecticide-Treated Nets
Source: Insects. 2021 Dec 21;13(1):7. doi: 10.3390/insects13010007 (PMC8778287; doi:10.3390/insects13010007)
Supplement: Supplementary file 1 [file insects-13-00007-s001.zip]

Archive with 4 entries (4 files):
- Additional File S1_Developing consensus SOPs for evaluating next-generation ITNs_Supplementary tables and figures_005.pdf
- Additional File S2_PBO ITN Durability - SOP.pdf
- Additional File S3_PPF ITN Durability - SOP.pdf
- Additional File S4_CFP ITN Durability - SOP.pdf
